# Supplementary material for: Epidemiological Trends of Haematological Malignancies in Belgium 2004–2018: Older Patients Show the Greatest Improvement in Survival
Source: MDPI journal article supplement (doi:10.3390/cancers15174388), 2023-09-01
Supplement: s1 [file s1]

# Supplementary Materials:

**Table S1:** Selection of ICD-O-3 codes for the 24 main HM types with respective abbreviations.

| Abbreviation | HM subtype                                                                                             | Topography           | Histology                                                                                                | Behaviour | Differentiation |
|--------------|--------------------------------------------------------------------------------------------------------|----------------------|----------------------------------------------------------------------------------------------------------|-----------|-----------------|
| HL           | Hodgkin lymphoma                                                                                       | Any                  | 9650-9655,9659,9661-9665,9667                                                                            | 3         | Any             |
| CLL/SLL      | B-cell chronic lymphocytic leukaemia / small lymphocytic lymphoma                                      | Any                  | 9670,9823                                                                                                | 3         | Any             |
| HCL          | Hairy cell leukaemia                                                                                   | Any                  | 9940                                                                                                     | 3         | Any             |
| Other MBCL   | Other Mature B-cell leukaemia and related lymphoma                                                     | Any                  | 9833                                                                                                     | 3         | Any             |
|              |                                                                                                        | C420-C421            | 9591                                                                                                     | 3         | 6               |
| IPD          | Immunoproliferative disease                                                                            | Any                  | 9671,9760-9762,9764                                                                                      | 3         | Any             |
| PCN          | Plasma cell neoplasm                                                                                   | Any                  | 9731-9734                                                                                                | 3         | Any             |
| MZL          | Marginal zone lymphoma                                                                                 | Any                  | 9689,9699                                                                                                | 3         | Any             |
| FL           | Follicular lymphoma and related lymphoma                                                               | Any                  | 9597,9690,9691,9695,9698                                                                                 | 3         | Any             |
| MCL          | Mantle cell lymphoma                                                                                   | Any                  | 9673                                                                                                     | 3         | Any             |
| DLBCL        | Diffuse large B-cell lymphoma and related large B-cell lymphoma                                        | Any                  | 9675,9678-9680,9684,9688,9712,9735,9737,9738,9766                                                        | 3         | Any             |
| BL           | Burkitt lymphoma / leukaemia                                                                           | Any                  | 9687,9826                                                                                                | 3         | Any             |
| pCTCL        | Primary cutaneous T-cell lymphoma                                                                      | Any                  | 9700-9701,9709,9718,9726                                                                                 | 3         | Any             |
| PNK/TCL      | Peripheral NK/T-cell lymphoma                                                                          | Any                  | 9702,9705,9708,9714-9717,9719,9724,9827,9831,9834,9948                                                   | 3         | Any             |
| ALL/LL       | Precursor lymphoid neoplasm or acute lymphoblastic leukaemia / lymphoma                                | Any                  | 9811-9819,9727-9729,9835-9837                                                                            | 3         | Any             |
| AML          | Acute myeloid leukaemia and related precursor neoplasm (includes acute leukaemia of ambiguous lineage) | Any                  | 9801,9805-9809,9840,9861,9865-9867,9869-9874,9877-9879,9891,9895-9898,9910-9912,9920,9930,9931,9984,9987 | 3         | Any             |
| CML          | Chronic myeloid leukaemia                                                                              | Any                  | 9863,9875                                                                                                | 3         | Any             |
| PV           | Polycythaemia vera                                                                                     | Any                  | 9950                                                                                                     | 3         | Any             |
| ET           | Essential thrombocythaemia                                                                             | Any                  | 9962                                                                                                     | 3         | Any             |
| PMF          | Primary myelofibrosis                                                                                  | Any                  | 9961                                                                                                     | 3         | Any             |
| Other MPN    | Other MPN and related neoplasm                                                                         | Any                  | 9960,9963-9968                                                                                           | 3         | Any             |
| MCN          | Mast cell neoplasm                                                                                     | Any                  | 9740-9742,9749                                                                                           | 3         | Any             |
|              |                                                                                                        | Any                  | 9740,9741                                                                                                | 1         | Any             |
| MDS          | Myelodysplastic syndrome                                                                               | Any                  | 9980,9982,9983,9985,9986,9989,9991-9993                                                                  | 3         | Any             |
| MDS/MPN      | Myelodysplastic / myeloproliferative neoplasm                                                          | Any                  | 9876,9945,9946,9975                                                                                      | 3         | Any             |
| HDCN         | Histiocytic and dendritic cell neoplasm                                                                | Any                  | 9750,9751,9754-9759                                                                                      | 3         | Any             |
|              |                                                                                                        | Any                  | 9751-9753                                                                                                | 1         | Any             |
| Not included | Other leukaemia                                                                                        | Any                  | 9800,9860                                                                                                | 3         | Any             |
|              | Other lymphoid neoplasm                                                                                | Any                  | 9590,9596,9820,9832                                                                                      | 3         | Any             |
|              |                                                                                                        | C000-C419, C422-C809 | 9591                                                                                                     | 3         | 1-5             |
|              |                                                                                                        | C420-C421            | 9591                                                                                                     | 3         | 7-9             |

**Table S2:** Conditional 5-year relative survival by HM type, Belgium 2009-2018

| HM type    | Years after diagnosis |             |             |             |             |             |
|------------|-----------------------|-------------|-------------|-------------|-------------|-------------|
|            | 0                     | 1           | 2           | 3           | 4           | 5           |
| HL         | 88.4                  | 94.2        | 95.6        | 96.5        | 96.6        | 96.7        |
| CLL/SLL    | 90.4                  | 92.3        | 91.5        | 91.2        | 90.6        | 89.2        |
| HCL        | 96.7                  | 98.1        | 99.4        | 98.9        | 99.4        | 102.0       |
| Other MBCL | 77.7                  | 92.2        | 94.3        | 95.3        | 93.0        | 103.2       |
| IPD        | 83.2                  | 87.6        | 86.2        | 86.6        | 84.4        | 80.4        |
| PCN        | 56.7                  | 62.4        | 63.6        | 64.5        | 65.2        | 67.6        |
| MZL        | 88.0                  | 91.3        | 93.1        | 93.4        | 92.4        | 92.2        |
| FL         | 90.5                  | 91.9        | 92.9        | 93.3        | 93.9        | 94.7        |
| MCL        | 62.6                  | 68.2        | 69.1        | 70.4        | 71.0        | 73.0        |
| DLBCL      | 61.1                  | 82.9        | 89.5        | 92.1        | 91.5        | 90.9        |
| BL         | 67.1                  | 90.8        | 97.2        | 98.0        | 99.8        | 101.1       |
| pCTCL      | 88.4                  | 91.2        | 92.4        | 92.1        | 92.3        | 96.2        |
| PNK/TCL    | 52.0                  | 71.5        | 79.1        | 81.3        | 80.7        | 83.3        |
| ALL/LL     | 68.1                  | 82.1        | 88.9        | 92.0        | 93.3        | 95.0        |
| AML        | 24.6                  | 52.9        | 69.3        | 78.7        | 84.8        | 89.8        |
| CML        | 87.5                  | 89.6        | 89.8        | 91.1        | 92.9        | 93.1        |
| PV         | 95.5                  | 95.0        | 94.5        | 92.9        | 89.6        | 89.5        |
| ET         | 93.5                  | 92.7        | 90.6        | 88.5        | 89.6        | 89.8        |
| PMF        | 52.3                  | 52.0        | 58.0        | 59.6        | 63.9        | 63.8        |
| Other MPN  | 74.3                  | 79.4        | 83.8        | 88.4        | 94.9        | 98.5        |
| MCN        | 92.7                  | 95.5        | 92.6        | 92.1        | 95.2        | 95.8        |
| MDS        | 46.9                  | 53.3        | 58.9        | 63.4        | 66.1        | 67.0        |
| MDS/MPN    | 45.1                  | 49.1        | 54.0        | 59.4        | 67.2        | 67.1        |
| HDCN       | 87.6                  | 91.5        | 92.8        | 93.6        | 95.6        | 97.3        |
| <b>HM</b>  | <b>68.8</b>           | <b>79.3</b> | <b>82.9</b> | <b>84.9</b> | <b>86.1</b> | <b>87.0</b> |

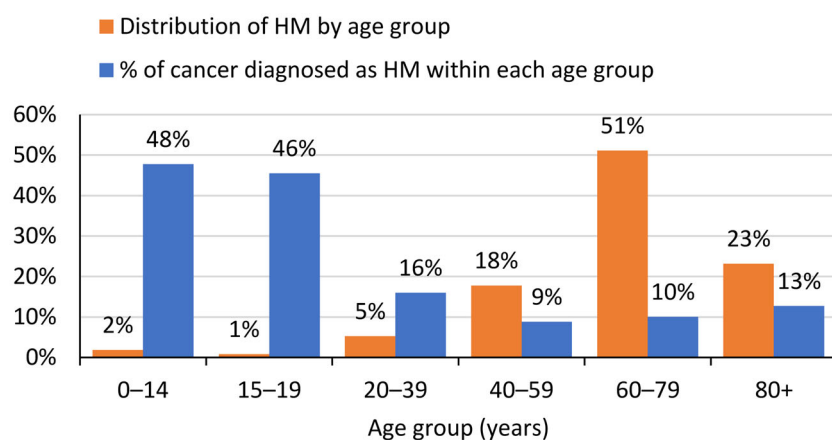**Figure S1:** Proportion of HM diagnoses (N) by age group, Belgium 2018
